# Supplementary material for: Electrochemical Study of Anodized Titanium in Phosphoric Acid
Source: Hindawi journal article supplement (doi:10.1155/2020/5769071), 2020-01-01
Supplement: f1 [file 5769071.f1.pdf]

# Graphical abstract

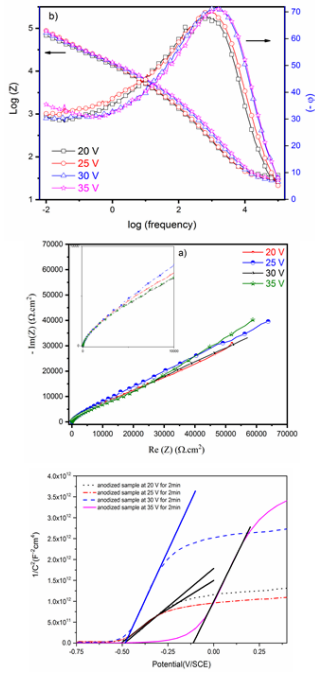

| Applied potential                       | 20 V  | 25 V  | 30 V  | 35 V  |
|-----------------------------------------|-------|-------|-------|-------|
| Nd ( $\times 10^{18} \text{ cm}^{-3}$ ) | 1.31  | 1.44  | 1.96  | 5.28  |
| $E_{\text{ss}}(\text{V})$               | -0.47 | -0.42 | -0.39 | -0.12 |

Electrical parameters

Electrochemical studies

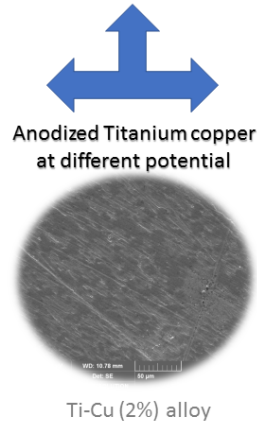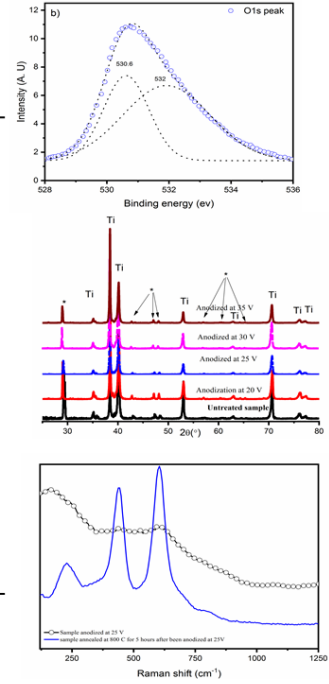

Characterization technics
